# Supplementary material
Source: publisher site journal article supplement (https://www.dovepress.com/article/210697)
Supplement: Supplementary file 1 [file get_supplementary_file.php]

Figure S1 (A) The BrdU assay in sh-NC, sh1 and sh2 group. (B) The expression level of E-cadherin, N-cadherin and Vimentin in different group.
